# Supplementary material for: Efficacy of Ixekizumab in Chinese Patients with Radiographic-Axial Spondyloarthritis by Baseline Inflammation Status on Magnetic Resonance Imaging
Source: Springer Nature journal article supplement (doi:10.1007/s40744-025-00819-w), 2026-01-06
Supplement: MOESM1 [file 40744_2025_819_MOESM1_ESM.pdf]

1 **SUPPLEMENTARY MATERIAL**

2 **Efficacy of Ixekizumab in Chinese Patients with Radiographic-Axial Spondyloarthritis**  
3 **by Baseline Inflammation Status on Magnetic Resonance Imaging**

4 Xiaoxia Zhu<sup>1</sup>, Jiankang Hu<sup>2</sup>, Dongzhou Liu<sup>3</sup>, Jingyang Li<sup>4</sup>, Huaxiang Wu<sup>5</sup>, Lingyun Sun<sup>6</sup>, Lie Dai<sup>7</sup>,  
5 Chunyu Tan<sup>8</sup>, Zhijun Li<sup>9</sup>, Zhengyu Xiao<sup>10</sup>, Yongfu Wang<sup>11</sup>, Lingli Dong<sup>12</sup>, Yan Yan<sup>13</sup>, Hongying  
6 Li<sup>13</sup>, and Hejian Zou<sup>1\*</sup>

7 **Author affiliations:**

8 <sup>1</sup> *Department of Rheumatology, Huashan Hospital affiliated to Fudan University, Shanghai,*  
9 *China.*

10 <sup>2</sup> *Department of Rheumatology, Pingxiang People's Hospital, Pingxiang, Jiangxi Province,*  
11 *China.*

12 <sup>3</sup> *Department of Rheumatology, Shenzhen People's Hospital, The Second Clinical Medical*  
13 *College of Jinan University, Shenzhen, China.*

14 <sup>4</sup> *Department of Rheumatology, The Affiliated Zhuzhou Hospital Xiangya Medical College*  
15 *Central South University, Zhuzhou, Hunan Province, China.*

16 <sup>5</sup> *Department of Rheumatology, The Second Affiliated Hospital Zhejiang University School*  
17 *of Medicine, Hangzhou, Zhejiang Province, China.*

18 <sup>6</sup> *Department of Rheumatology, Nanjing Drum Tower Hospital, The Affiliated Hospital of*  
19 *Nanjing University Medical School, Nanjing, Jiangsu Province, China.*

20 <sup>7</sup> *Department of Rheumatology, Sun Yat-sen Memorial Hospital, Sun Yat-sen University,*  
21 *Guangzhou, Guangdong Province, China.*

22 <sup>8</sup> *Department of Rheumatology, West China Hospital of Sichuan University, Chengdu,*  
23 *Sichuan Province, China.*

24 <sup>9</sup> *Department of Rheumatology, The First Affiliated Hospital of Bengbu Medical University,*  
25 *Bengbu, Anhui Province, China.*

26 <sup>10</sup> *Department of Rheumatology, The First Affiliated Hospital of Shantou University Medical*  
27 *College, Shantou, Guangdong Province, China.*

28 <sup>11</sup> *Department of Rheumatology, The First Affiliated Hospital of Baotou Medical College,*  
29 *Baotou, Inner Mongolia Autonomous Region, China.*

30 <sup>12</sup> *Department of Rheumatology, Tongji Hospital, Tongji Medical College, Huazhong*  
31 *University of Science and Technology, Wuhan, Hubei Province, China.*

32 <sup>13</sup> *Eli Lilly and Company, Shanghai, China*

33

34

35 **\*Corresponding author:**

36 Hejian Zou

37 Department of Rheumatology, Huashan Hospital affiliated to Fudan University, Shanghai,  
38 200040, China

39 Email: [mail@hjzou.md](mailto:mail@hjzou.md)

40 **Supplementary Table S1.** Full list of ethical approvals

| <b>Investigator's Name/<br/>Site Number</b> | <b>Name and address of the ethics review committee</b>                                                                                                                                                                                                                                          |
|---------------------------------------------|-------------------------------------------------------------------------------------------------------------------------------------------------------------------------------------------------------------------------------------------------------------------------------------------------|
| Xu Jian/725                                 | Ethics Committee of the First Affiliated Hospital of Kunming Medical University, Room 909, 9th Floor, North Building, First Affiliated Hospital of Kunming Medical University, No. 295 Xichang Road, Wuhua District, Kunming, Yunnan Province, China                                            |
| Sun Lingyun/720                             | Medical Ethics Committee of Drum Tower Hospital Affiliated to Nanjing University Medical School, Ethics Office, 9th Floor, Building 2, No. 321, Zhongshan Road, Gulou District, Nanjing, Jiangsu Province, China                                                                                |
| Li Xiaomei/723                              | Anhui Provincial Hospital Clinical Trial Ethics Committee, Ethics Office, 4th Floor, Administrative Building, Anhui Provincial Hospital, No. 17, Lujiang Road, Hefei, Anhui Province, China                                                                                                     |
| Wang Yanyan/719                             | Ethics Committee of the First Affiliated Hospital of Nanjing Medical University, 3rd Floor, Pharmacy Building, No. 300, Guangzhou Road, Gulou District, Nanjing, Jiangsu Province, China                                                                                                        |
| Dong Lingli/726                             | Huazhong University of Science and Technology Drug Clinical Trial Ethics Committee, 16th Floor, Basic Medicine Building, Tongji Medical College, Huazhong University of Science and Technology, No. 13, Hankou Hangkong Road, Qiaokou District, Wuhan City, Hubei Province, China               |
| Hu Jiankang/730                             | Pingxiang People's Hospital Ethics Committee, 6th Floor, Magnetic Resonance Building, Pingxiang People's Hospital, No. 8 Wugongshan Middle Avenue, Anyuan District, Pingxiang City, Jiangxi Province, China                                                                                     |
| Li Jingyang/731                             | Zhuzhou Central Hospital Drug Clinical Trial Ethics Committee, Room 570, Pharmacy Department, 5th Floor, Area C, Outpatient Building, Zhuzhou Central Hospital, No. 116, Changjiang South Road, Tianyuan District, Zhuzhou City, Hunan Province, China                                          |
| Wang Yongfu/728                             | Ethics Committee of Drug Clinical Trials of the First Affiliated Hospital of Baotou Medical College, Inner Mongolia Medical University, 2nd Floor, Administrative Building, No. 41, Linyin Road, Kun District, Baotou City, Inner Mongolia Autonomous Region, China                             |
| Li Zhijun/735                               | Clinical Medicine Research Ethics Committee of the First Affiliated Hospital of Bengbu Medical University, Clinical Medicine Research Ethics Office, 9th Floor, Administrative Building, First Affiliated Hospital of Bengbu Medical College, 287 Changhuai Road, Bengbu, Anhui Province, China |
| Tan Chunyu/721                              | Sichuan University West China Hospital Clinical Trial Ethics Review Committee, Room 412-413, Building 8, West China Hospital, Sichuan University, No. 37, Guoxue Lane, Wuhou District, Chengdu, Sichuan Province, China                                                                         |
| Zou Hejian/710                              | Ethics Review Committee of Huashan Hospital Affiliated to Fudan University, Ethics Office, 10th Floor, Huashan Hospital, Fudan University, No. 12 Wulumuqi Middle Road, Jing'an District, Shanghai, China                                                                                       |
| Huang Anbin/738                             | Medical Ethics Committee of Union Hospital Affiliated to Tongji Medical College of Huazhong University of Science and Technology                                                                                                                                                                |

|                  |                                                                                                                                                                                                                                                                                         |
|------------------|-----------------------------------------------------------------------------------------------------------------------------------------------------------------------------------------------------------------------------------------------------------------------------------------|
|                  | Office of Medical Ethics Committee, 6th Floor, Pharmacy Building, No. 1277 Jiefang Avenue, Wuhan City, Hubei Province, China                                                                                                                                                            |
| Dai Lie /714     | Ethics Committee of Sun Yat-sen Memorial Hospital, Sun Yat-sen University, Ethics Committee of Sun Yat-sen Memorial Hospital, Sun Yat-sen University, 107 Yanjiang West Road, Guangzhou, Guangdong, China                                                                               |
| Liu Dongzhou/716 | Shenzhen People's Hospital Drug Clinical Trial Ethics Committee, Ethics Committee Office, 3rd Floor, Building 3, Shenzhen People's Hospital, No. 1017, Dongmen North Road, Luohu District, Shenzhen, Guangdong, China                                                                   |
| Wu Huaxiang/718  | Ethics Committee of the Second Affiliated Hospital of Zhejiang University School of Medicine, Ethics Committee Office, Building 9, The Second Affiliated Hospital, Zhejiang University School of Medicine, No. 88 Jiefang Road, Shangcheng District, Hangzhou, Zhejiang Province, China |
| Xiao Zhengyu/717 | Ethics Committee of Drug Clinical Trials of the First Affiliated Hospital of Shantou University Medical College, 8th Floor, Science and Education Building, No. 52 Dongxia South Road, Jinping District, Shantou City, Guangdong Province, China                                        |
| Wu Lijun/732     | Ethics Committee of Xinjiang Uygur Autonomous Region People's Hospital, No. 91 Tianchi Road, Urumqi, Xinjiang Uyghur Autonomous Region, China                                                                                                                                           |
| Zhang Zhuoli/712 | Biomedical Research Ethics Committee of Peking University First Hospital, No. 6 Dahongluochang Street, Xicheng District, Beijing, China                                                                                                                                                 |
| Huang Cibo/713   | Beijing Hospital Ethics Committee, No. 1, Dahua Road, Dongdan, Dongcheng District, Beijing, China                                                                                                                                                                                       |
| Li Hongbin/727   | Ethics Committee of the Affiliated Hospital of Inner Mongolia Medical University, No. 1 Tongdao North Street, Huimin District, Hohhot, Inner Mongolia Autonomous Region, China                                                                                                          |
